# Supplementary material
Source: publisher figshare collection journal article supplement (https://gsapubs.figshare.com/ndownloader/files/23303249)
Supplement: Supplementary file 1 [file 23303249]

Archive with 3 entries (3 files):
- L555_AnalyticalMethods.pdf
- L555_TableDR1.xlsx
- L555_TableDR2.xlsx
