# Supplementary material
Source: publisher figshare collection journal article supplement (https://gsapubs.figshare.com/ndownloader/files/23303249)
Supplement: Supplementary file 1 [file 23303249 › L555_TableDR1.xlsx]

## Sheet: Zircon
Montz, W.J., and Kruckenberg, S.C., 2017, Cretaceous partial melting, deformation, and exhumation of the Potters Pond migmatite domain, west-central Idaho: Lithosphere, doi:10.1130/L555.1.
TABLE DR1. Summary of LA-ICP-MS U-Pb zircon results for migmatitic rocks in the Potters Pond migmatite domain
					Isotope Ratios							Ages (in Ma)
Spot	U	Th	U/Th		206Pb*/	±1σ	207Pb*/	±1σ	206Pb*/	±1σ		206Pb*/	±1σ	207Pb/	±1σ	206Pb/	±1σ
Number	(ppm)	(ppm)			207Pb*	(%)	235U	(%)	238U	(%)		207Pb*	(Ma)	235U	(Ma)	238U	(Ma)
Sample 13WM24 - Leucosome in stromatic metatexite (N44.42670°, W116.12759°)
Rims
1	331.69	70.678	4.69298		20.8175	2.08105	0.0936491	2.66808	0.0141394	1.66969		101.075	49.2223	90.897	2.31982	90.51	1.50068
2	363.118	56.3647	6.4423		20.5004	2.25326	0.0983951	2.67458	0.0146296	1.44091		137.274	52.9616	95.2938	2.43277	93.6255	1.33931
4	131.386	23.0679	5.69561		20.3499	4.84867	0.103656	5.25311	0.0152988	2.02128		154.507	113.583	100.146	5.00971	97.8756	1.96339
6	384.484	70.0565	5.4882		20.5344	2.75711	0.102402	3.25211	0.0152507	1.7247		133.374	64.8233	98.9913	3.06737	97.57	1.67012
7	546.376	98.1019	5.56948		20.1985	2.40233	0.100317	2.79936	0.0146958	1.43709		171.961	56.0788	97.0689	2.59147	94.0458	1.34171
9	344.48	59.5684	5.78293		20.3463	2.4972	0.0994318	2.88326	0.0146727	1.44124		154.967	58.4994	96.2517	2.64772	93.8989	1.3435
10	410.855	87.0878	4.71771		20.331	2.27245	0.0952639	2.57165	0.0140471	1.2039		156.705	53.209	92.3951	2.27119	89.9232	1.07507
12	588.068	100.916	5.82729		20.5788	2.34173	0.105148	2.89405	0.0156935	1.70054		128.299	55.0864	101.517	2.79587	100.381	1.6938
13	1116.7	996.852	1.12022		20.1775	1.43776	0.113595	2.01505	0.0166237	1.41183		174.39	33.5243	109.249	2.08713	106.282	1.48822
15	254.995	60.635	4.2054		20.3146	3.43924	0.117053	4.05699	0.0172461	2.15192		158.577	80.512	112.397	4.31664	110.227	2.35184
17	386.725	81.279	4.758		20.7476	2.75478	0.0954003	2.96232	0.0143554	1.08927		109.025	65.06	92.5216	2.61963	91.8831	0.99376
18	178.296	41.764	4.26914		20.7328	3.77839	0.0927062	4.26647	0.0139401	1.98155		110.684	89.2271	90.0212	3.67541	89.2428	1.75621
19	1144.05	122.317	9.35312		20.6433	1.73287	0.0956784	2.26252	0.0143249	1.45471		120.881	40.8468	92.7793	2.00611	91.6891	1.32437
21	369.596	59.501	6.2116		20.8373	2.51216	0.0951147	3.19605	0.0143744	1.9758		98.8374	59.4235	92.2568	2.81859	92.0034	1.80489
22	493.332	123.231	4.00332		20.1115	2.79565	0.0970253	3.32297	0.0141523	1.79625		182.034	65.1398	94.0268	2.98419	90.5923	1.61588
23	448.299	52.1673	8.59348		20.6992	2.68581	0.095156	3.15659	0.0142853	1.65846		114.515	63.3478	92.2951	2.78489	91.4372	1.50575
25	902.613	58.9365	15.315		20.5637	1.35866	0.102544	2.18955	0.0152937	1.71703		130.026	31.9489	99.1223	2.06777	97.843	1.66731
27	643.573	5.57163	115.509		20.1157	2.27576	0.11177	2.64549	0.0163064	1.34889		181.544	53.0332	107.583	2.70051	104.27	1.39517
29	428.511	79.9799	5.35773		20.2168	2.63404	0.101041	3.05276	0.0148153	1.54311		169.85	61.5037	97.7369	2.84458	94.8048	1.45224
31	1112.08	195.006	5.70281		20.4107	1.8773	0.107288	2.70717	0.0158821	1.95051		147.538	44.0249	103.481	2.6634	101.578	1.96576
33	334.765	61.0943	5.47948		20.2296	3.21384	0.0985008	3.58477	0.014452	1.58801		168.369	75.0905	95.3915	3.26386	92.4965	1.45837
35	920.739	68.3669	13.4676		21.1999	1.75266	0.103964	2.18957	0.0159851	1.3124		57.818	41.8007	100.428	2.09371	102.231	1.3311
37	651.857	85.0994	7.65995		21.0249	2.37683	0.100183	2.90337	0.0152765	1.66739		77.5493	56.4847	96.9449	2.68448	97.7342	1.61732
38	593.781	159.32	3.72698		20.7297	1.71018	0.0985804	2.36401	0.0148211	1.63212		111.035	40.3582	95.4651	2.15397	94.8421	1.53661
40	306.398	53.5916	5.71729		20.1376	2.71573	0.0972797	3.14595	0.0142079	1.58803		179.01	63.3049	94.2622	2.83197	90.9452	1.4341
41	402.458	82.8904	4.85531		21.2238	2.63215	0.0941389	2.95204	0.0144908	1.33654		55.1433	62.7816	91.3516	2.57899	92.7431	1.23067
43	688.744	96.3768	7.14637		20.8199	2.07172	0.0957078	2.54462	0.0144519	1.47751		100.791	49.0164	92.8065	2.25687	92.4959	1.35688
45	300.661	55.7176	5.39617		20.2598	3.72812	0.096209	4.09944	0.0141367	1.70484		164.89	87.184	93.2709	3.65324	90.4932	1.53199
47	746.557	63.0064	11.8489		20.9128	1.93279	0.103472	2.30585	0.015694	1.25749		90.2518	45.7841	99.9764	2.19545	100.384	1.25254
49	352.041	91.0868	3.8649		20.6761	2.94495	0.0952551	3.28714	0.0142842	1.46033		117.136	69.4355	92.387	2.90283	91.4305	1.32576
Cores
3	719.259	194.116	3.7053		20.4099	1.85536	0.103455	2.47565	0.0153141	1.63906		147.618	43.5111	99.9603	2.35677	97.9725	1.59368
5	600.059	83.6331	7.17489		20.137	1.53606	0.145975	4.56613	0.0213192	4.30001		179.076	35.8034	138.352	5.9059	135.988	5.78626
8	222.659	98.0543	2.27078		21.1496	3.54059	0.0985416	3.96378	0.0151154	1.78207		63.5284	84.3279	95.4292	3.61031	96.7112	1.71059
11	614.443	408.655	1.50357		18.8314	1.36778	0.390754	3.2811	0.0533685	2.98241		333.195	30.996	334.92	9.36084	335.169	9.74072
14	550.076	192.411	2.85886		18.2226	1.62548	0.245469	3.02134	0.0324419	2.54683		407.19	36.3768	222.889	6.04643	205.813	5.15891
16	485.094	96.1734	5.04395		20.4767	2.42356	0.102336	2.81377	0.015198	1.42958		139.964	56.9279	98.9303	2.65237	97.2355	1.37963
20	180.101	51.4746	3.49884		19.7241	3.74319	0.10939	4.12003	0.0156485	1.72137		227.19	86.535	105.407	4.12501	100.096	1.70971
24	470.285	29.0195	16.2058		20.2812	1.85377	0.123666	2.39258	0.0181904	1.5126		162.463	43.342	118.39	2.67369	116.209	1.74203
26	107.134	60.1157	1.78212		21.1277	4.80388	0.104585	5.2685	0.0160258	2.16329		65.9601	114.393	101	5.06512	102.49	2.19961
28	147.761	60.2886	2.4509		8.83856	0.906264	4.56128	1.45228	0.292393	1.13481		1850.45	16.3868	1742.22	12.0952	1653.48	16.5507
30	1063.4	84.056	12.6511		20.9562	1.6259	0.110492	2.4345	0.0167936	1.81196		85.3575	38.55	106.415	2.45954	107.359	1.9292
32	161.223	53.1127	3.03548		20.4248	3.91089	0.0993827	4.27124	0.014722	1.71712		145.937	91.7679	96.2064	3.92056	94.2126	1.60598
34	478.06	95.0627	5.02889		20.8112	2.11096	0.100047	2.63364	0.0151008	1.57477		101.811	49.9184	96.8197	2.43209	96.6181	1.51016
36	1284.16	717.599	1.78953		16.4813	4.66802	0.157358	5.07899	0.0188096	2.00142		627.711	100.648	148.388	7.0119	120.128	2.382
39	178.979	60.845	2.94156		20.5517	3.46719	0.10227	3.87349	0.0152439	1.72699		131.382	81.5838	98.8699	3.64919	97.5271	1.67161
42	267.841	85.7098	3.12498		19.4876	2.5751	0.137024	3.02477	0.0193666	1.58685		254.982	59.2012	130.389	3.70127	123.652	1.94347
44	3465.57	241.885	14.3274		20.8969	1.15799	0.110844	1.6376	0.0167994	1.15793		92.0618	27.4346	106.737	1.6592	107.396	1.23327
46	254.752	73.5246	3.46485		20.5154	3.1951	0.0976157	3.42485	0.0145244	1.23327		135.528	75.0954	94.573	3.09273	92.9568	1.13818
48	607.735	508.795	1.19446		20.171	1.91181	0.123366	3.05228	0.0180477	2.37937		175.142	44.5961	118.119	3.40354	115.306	2.71916
50	447.385	112.529	3.97572		20.8211	2.23304	0.09914	2.71609	0.014971	1.54618		100.642	52.8189	95.9822	2.48754	95.7942	1.4702
Sample 13WM25 - Schlierin-textured granodiorite diatexite (N44.41028°, W116.13582°)
Rims
1	182.799	45.1699	4.04692		13.6156	1.13863	1.55344	1.94145	0.153402	1.5725		1026.25	23.0513	951.863	11.9935	1026.25	23.0513
3	901.647	18.8597	47.8081		19.2857	1.21096	0.167645	2.10582	0.0234491	1.7228		278.905	27.7318	157.373	3.06996	149.417	2.54457
5	381.516	17.5573	21.7297		11.7109	1.80162	0.45206	2.91933	0.0383958	2.2971		1324.41	34.894	378.721	9.22861	242.882	5.47543
6	550.347	12.6459	43.5197		21.2309	2.09587	0.0972576	3.00703	0.0149758	2.15629		54.3661	49.992	94.2417	2.70635	95.8245	2.05097
8	159.404	22.1162	7.20759		13.3555	1.38576	1.58871	2.26212	0.153888	1.78798		1065.18	27.8679	965.793	14.0973	1065.18	27.8679
10	635.643	12.862	49.4204		18.6155	2.27213	0.187815	3.75498	0.0253574	2.98953		359.248	51.2818	174.763	6.02869	161.426	4.76595
11	617.945	2.99346	206.432		20.6863	1.71078	0.130465	2.1635	0.0195738	1.32438		116.003	40.3626	124.516	2.53528	124.962	1.63903
13	420.416	11.4754	36.6364		20.2711	2.0543	0.127528	2.61563	0.0187492	1.61907		163.585	48.0157	121.874	3.00391	119.746	1.92088
15	518.722	7.16129	72.4342		18.4262	3.92438	0.151772	4.18203	0.0202827	1.44521		382.272	88.2115	143.475	5.59559	129.442	1.85206
17	307.899	11.1075	27.7198		20.5628	2.72465	0.113625	3.32941	0.0169455	1.91345		130.075	64.114	109.276	3.44932	108.323	2.05538
20	583.333	7.67036	76.0502		14.8761	1.98915	0.233603	2.49789	0.0252039	1.51088		844.65	41.3932	213.169	4.80297	160.461	2.39444
22	611.639	3.81653	160.26		20.5769	1.6896	0.127879	2.19805	0.0190843	1.40594		128.514	39.7364	122.19	2.53048	121.866	1.69728
23	619.483	6.28193	98.6134		20.5003	1.40436	0.100581	1.8235	0.0149545	1.16316		137.285	32.9794	97.3122	1.69211	95.6894	1.1048
27	1026.31	7.98722	128.494		20.8095	1.3778	0.162765	1.81538	0.0245652	1.18206		101.985	32.5857	153.12	2.58028	156.443	1.82699
28	538.232	12.4793	43.13		21.0157	1.52097	0.120648	1.86576	0.0183891	1.08061		78.5918	36.1093	115.659	2.03956	117.467	1.25786
30	443.459	7.31295	60.6403		20.5999	1.6085	0.114729	2.52789	0.0171411	1.95012		125.836	37.8455	110.283	2.64177	109.562	2.11855
31	469.592	59.5649	7.88371		15.0639	1.58844	0.498536	2.25391	0.0544668	1.59906		818.527	33.186	410.711	7.61386	341.887	5.32455
34	442.721	6.87637	64.3829		19.6498	2.3555	0.144038	2.84789	0.0205274	1.60066		235.92	54.351	136.634	3.64077	130.988	2.07551
36	280.833	23.8118	11.7939		14.2448	1.44124	0.593346	2.10298	0.0613005	1.53145		934.215	29.5866	473.002	7.9519	383.53	5.70225
38	586.132	16.8139	34.8601		20.2495	1.43028	0.117586	1.85341	0.017269	1.17874		166.081	33.4293	112.881	1.98005	110.373	1.28994
45	662.822	21.7466	30.4794		19.238	0.998942	0.240408	1.90046	0.0335433	1.61674		284.563	22.8374	218.754	3.74002	212.687	3.38249
46	33.9347	23.674	1.43341		11.5899	1.47296	2.56498	1.87221	0.215607	1.15567		1344.49	28.4493	1290.71	13.6785	1344.49	28.4493
47	253.316	32.8515	7.71094		16.5271	2.3711	0.213286	2.7235	0.0255657	1.3399		621.717	51.1676	196.306	4.86138	162.736	2.1532
Cores
2	26.7777	6.6706	4.01428		13.5179	2.33279	1.65237	2.56813	0.162	1.07395		1040.79	47.0788	990.457	16.2464	967.882	9.65189
4	161.075	35.1087	4.58789		13.4871	1.20936	1.73281	1.75008	0.1695	1.265		1045.43	24.4117	1020.8	11.268	1009.35	11.8189
7	19.1774	4.94822	3.87561		10.5374	2.08884	3.10222	2.59631	0.237086	1.54194		1526.07	39.3615	1433.24	19.9387	1371.53	19.0499
9	66.4282	30.2728	2.19432		11.331	1.21296	2.75319	1.95922	0.226258	1.53859		1387.99	23.286	1342.95	14.5941	1314.86	18.3006
12	239.7	76.1623	3.14722		13.2813	1.10459	1.81625	1.56761	0.17495	1.11234		1076.38	22.1758	1051.33	10.2657	1039.33	10.677
16	81.6474	41.7868	1.9539		5.4252	1.4477	10.2943	2.19061	0.405052	1.64406		2692.16	23.9219	2461.59	20.2763	2192.26	30.5533
21	168.265	88.2173	1.90739		6.19792	1.03485	8.79697	1.72004	0.395437	1.37392		2469.78	17.4723	2317.18	15.6836	2148	25.0985
24	148.131	15.3944	9.62241		20.3602	3.84078	0.105728	4.18747	0.0156124	1.66833		153.34	89.9647	102.05	4.06561	99.8666	1.65326
26	88.6939	77.8545	1.13923		10.926	1.14407	3.03871	1.77637	0.240795	1.3589		1457.53	21.7559	1417.4	13.5718	1390.83	17.0002
29	507.153	39.6483	12.7913		15.0501	5.66577	0.35657	10.8802	0.0389208	9.28853		820.443	118.431	309.651	29.046	246.14	22.4319
35	52.547	43.0686	1.22008		7.8689	1.23139	5.92193	1.87684	0.337968	1.4164		2057.99	21.728	1964.46	16.3053	1876.89	23.0641
37	71.3753	55.7899	1.27936		12.7629	1.1226	2.09677	1.80811	0.194088	1.41741		1155.8	22.2926	1147.75	12.4314	1143.48	14.8517
44	33.2956	33.4148	0.996432		8.93231	1.12217	4.7869	2.07169	0.31011	1.74144		1831.35	20.3386	1782.6	17.4023	1741.25	26.5729
Sample 13WM30 - Schlierin-textured granodiorite diatexite (N44.40779°, W116.13957°)
Rims
1	967.296	183.298	5.27717		20.8979	2.02252	0.117067	2.79921	0.0177433	1.93521		91.9473	47.932	112.409	2.97866	113.378	2.17491
2	329.236	55.4097	5.94184		20.9528	2.80403	0.0981428	3.23094	0.0149142	1.6051		85.7481	66.5133	95.0605	2.93197	95.433	1.52051
4	252.202	99.8565	2.52564		20.5093	3.10484	0.106215	3.31725	0.0157992	1.16795		136.2	72.9709	102.497	3.23411	101.052	1.17104
5	1938.67	257.07	7.54141		20.7587	1.43067	0.116886	2.19845	0.0175979	1.66925		107.776	33.794	112.245	2.33616	112.457	1.86091
7	597.314	69.3651	8.61116		20.0614	2.13243	0.100936	2.65579	0.014686	1.58301		187.84	49.6331	97.6395	2.47233	93.9838	1.47698
10	2018.74	27.544	73.2915		20.6864	1.58879	0.101284	2.25749	0.0151958	1.60374		115.997	37.4809	97.9611	2.10813	97.2219	1.54749
11	124.704	19.5135	6.39063		20.7499	3.93067	0.106908	4.22214	0.0160888	1.54153		108.734	92.8781	103.133	4.1406	102.89	1.57348
13	1085.47	72.4203	14.9885		20.9337	1.46082	0.103276	2.04007	0.01568	1.42404		87.9114	34.6356	99.7961	1.93906	100.295	1.41719
15	1685.12	147.297	11.4403		20.6985	1.84585	0.107732	2.48086	0.0161726	1.65755		114.583	43.5577	103.888	2.44986	103.421	1.70059
17	1515.75	68.6371	22.0835		20.6202	1.27012	0.0987641	1.86903	0.0147703	1.37115		123.52	29.9142	95.6348	1.70585	94.5194	1.28655
18	1355.17	32.3761	41.857		20.5926	1.60375	0.098956	2.11218	0.0147792	1.37452		126.723	37.7279	95.8122	1.93118	94.5757	1.29047
20	596.749	72.2129	8.26374		20.6561	2.26112	0.102902	2.79419	0.015416	1.6416		119.46	53.2998	99.4517	2.64712	98.6198	1.60662
22	744.53	62.5698	11.8992		20.9893	1.46445	0.0995288	2.14923	0.0151511	1.57308		81.571	34.7636	96.3413	1.9754	96.938	1.51351
24	447.486	61.6191	7.26212		20.3191	2.30207	0.105164	2.95107	0.0154978	1.84643		158.063	53.8684	101.532	2.85135	99.139	1.81653
25	1391.25	32.0551	43.4017		20.2948	1.33505	0.109357	1.99298	0.0160964	1.47974		160.902	31.2413	105.377	1.99484	102.938	1.51112
27	436.164	78.547	5.55291		20.1325	2.29233	0.105353	3.02584	0.0153831	1.97507		179.604	53.4386	101.706	2.92835	98.4108	1.92892
29	704.532	66.3719	10.6149		21.0215	1.93014	0.0942412	2.36728	0.0143682	1.37061		77.9323	45.839	91.4465	2.07018	91.9644	1.25152
30	2492.23	157.787	15.7949		20.3789	1.30606	0.102707	2.06233	0.0151802	1.59606		151.209	30.5908	99.2716	1.95041	97.1225	1.53851
32	1256.35	50.2891	24.9825		20.6871	1.26983	0.102737	1.93333	0.0154142	1.45784		115.891	29.9503	99.2992	1.8289	98.6086	1.42661
33	3126.17	157.627	19.8327		20.4348	1.20922	0.14423	1.9335	0.021376	1.50871		144.75	28.3583	136.805	2.47467	136.346	2.03547
34	1195.39	66.7035	17.9209		21.1751	1.62886	0.0962613	2.04756	0.0147834	1.2407		60.658	38.8024	93.3193	1.8256	94.6026	1.16516
36	1502.11	61.9466	24.2485		20.4939	1.30199	0.108364	2.62949	0.0161068	2.28452		137.988	30.5605	104.468	2.61038	103.004	2.33444
38	1290.8	63.8008	20.2317		20.829	1.23941	0.106012	1.88155	0.0160149	1.41566		99.7417	29.3204	102.311	1.83123	102.42	1.43847
39	951.427	12.5143	76.0269		20.3372	1.60835	0.11496	2.27039	0.0169565	1.60245		155.969	37.6648	110.492	2.37694	108.393	1.72242
41	1195.85	98.2802	12.1677		20.4396	1.93449	0.119719	2.75856	0.0177475	1.96657		144.193	45.3691	114.818	2.9948	113.404	2.21067
42	836.438	105.872	7.90043		20.4724	2.03969	0.112459	2.69352	0.0166978	1.75918		140.45	47.882	108.212	2.76478	106.752	1.8625
43	1094.63	185.137	5.91255		20.6233	1.3411	0.115145	2.09289	0.0172227	1.60674		123.161	31.6004	110.661	2.19427	110.08	1.75368
45	1323.61	55.7853	23.7269		20.8906	1.76208	0.103552	2.4373	0.0156895	1.68389		92.7768	41.7341	100.05	2.32224	100.356	1.6768
47	606.15	114.733	5.28316		21.151	2.70833	0.106321	3.64508	0.0163098	2.43959		63.3204	64.5157	102.594	3.55694	104.292	2.52381
48	858.355	55.1543	15.5628		20.1894	1.97201	0.100897	2.69296	0.0147741	1.83391		173.017	46.013	97.6043	2.50608	94.5435	1.72119
50	1728.74	40.8542	42.3149		20.5806	1.19109	0.095309	1.75897	0.0142262	1.29433		128.091	28.0261	92.4369	1.55412	91.0621	1.17035
Cores
3	615.736	311.811	1.9747		18.1142	2.63065	0.205068	3.2662	0.0269411	1.9359		420.53	58.7405	189.405	5.64368	171.375	3.27393
6	181.002	98.0668	1.8457		21.1831	2.9855	0.102659	3.2497	0.0157719	1.28349		59.7606	71.1489	99.228	3.07207	100.879	1.28469
8	92.5401	90.2947	1.02487		20.9492	4.35135	0.116588	4.66868	0.0177141	1.69184		86.157	103.239	111.974	4.94981	113.193	1.89833
9	116.299	74.2364	1.5666		20.9621	5.37496	0.106629	5.64573	0.016211	1.72746		84.6537	127.586	102.877	5.52368	103.665	1.77644
12	686.304	243.649	2.81677		19.4213	1.52594	0.291103	2.37464	0.0410038	1.81946		262.82	35.0388	259.428	5.43649	259.052	4.6199
14	144.068	45.108	3.19384		20.0892	3.77248	0.109648	4.0421	0.0159759	1.45153		184.614	87.8575	105.644	4.05561	102.173	1.47138
16	184.193	172.94	1.06507		20.7396	2.85487	0.103439	3.17354	0.015559	1.38602		109.931	67.4085	99.9454	3.02071	99.5272	1.36887
19	161.027	54.6043	2.94898		19.9567	2.5614	0.114056	3.1625	0.0165084	1.8549		200.012	59.4672	109.669	3.28757	105.551	1.94193
21	512.035	242.152	2.11452		19.5898	1.56435	0.291201	2.33553	0.0413733	1.73421		242.936	36.0573	259.504	5.34832	261.34	4.44155
23	127.631	77.9595	1.63714		19.6404	4.99617	0.100994	5.51992	0.0143861	2.34688		237.005	115.322	97.6934	5.14135	92.0782	2.1456
26	99.6638	58.2753	1.71022		22.1076	5.93724	0.0961694	6.17745	0.0154198	1.70588		43.0523	144.39	93.2342	5.50304	98.6436	1.66994
28	61.7832	34.9915	1.76566		20.4271	7.00424	0.102411	7.36397	0.0151723	2.27347		145.681	164.437	98.9997	6.94628	97.0726	2.19038
31	147.785	53.2521	2.77519		18.4886	5.44817	0.124408	5.74175	0.0166821	1.81248		374.671	122.677	119.061	6.45067	106.653	1.91716
35	150.649	49.8664	3.02105		19.5386	3.69212	0.148838	4.22272	0.0210915	2.04931		248.949	85.0114	140.886	5.55498	134.551	2.72878
37	59.5614	40.6313	1.4659		23.4634	6.64359	0.0962352	7.04408	0.0163766	2.34132		189.762	166.276	93.2952	6.27899	104.715	2.43191
40	30.6949	17.1293	1.79195		23.9115	7.60682	0.0895557	8.00642	0.015531	2.49779		237.292	192.233	87.0894	6.68218	99.3497	2.46252
46	1300.95	107.639	12.0862		20.3409	1.69297	0.151131	4.36718	0.0222958	4.02568		155.563	39.64	142.91	5.8219	142.149	5.65985
49	89.1866	69.2181	1.28849		21.0867	5.76057	0.103946	6.12893	0.0158971	2.09276		70.5996	137.096	100.413	5.85977	101.673	2.11108
Sample 14WM37a - Discordant leucosome in stromatic metatexite (N44.41924°, W116.13478°)
Rims
1	1465.85	456.168	3.21341		21.1259	1.46923	0.0962993	2.1242	0.0147549	1.53414		66.1871	34.9766	93.3545	1.89461	94.4215	1.438
3	1394.46	336.296	4.14652		20.9681	2.00271	0.0974066	2.54791	0.0148131	1.57513		83.9669	47.5201	94.3796	2.29634	94.7912	1.48216
5	514.899	234.095	2.19953		20.7039	2.74948	0.103785	3.2174	0.0155842	1.67093		113.997	64.8574	100.264	3.07174	99.6873	1.6529
7	792.008	163.088	4.85633		21.0627	2.13932	0.0961466	3.04697	0.0146875	2.16963		73.2971	50.8535	93.2131	2.71372	93.993	2.02451
9	426.113	79.9051	5.33274		20.6177	3.09791	0.108088	4.11397	0.0161628	2.70697		123.801	72.9868	104.215	4.0747	103.359	2.77558
11	2253.85	109.25	20.6301		21.0414	1.57631	0.0951852	2.30359	0.0145259	1.6798		75.6787	37.4675	92.3221	2.0329	92.9665	1.55045
12	2157.34	406.138	5.31185		20.7584	1.32833	0.0874273	2.01686	0.0131625	1.51765		107.815	31.3845	85.104	1.64647	84.2975	1.27101
13	3062.96	456.159	6.71467		21.1271	1.22576	0.0870346	1.9398	0.0133362	1.50344		66.0516	29.2039	84.7372	1.57702	85.4024	1.27551
15	1552.68	380.908	4.07627		20.7741	1.76558	0.0965527	2.32655	0.0145474	1.51512		105.975	41.7037	93.5892	2.08007	93.1031	1.40048
17	2864.3	61.7563	46.3806		19.913	1.26834	0.111128	1.77996	0.0160493	1.24883		205.138	29.4503	106.996	1.80759	102.639	1.27164
18	514.014	123.3	4.16882		20.8712	2.4236	0.0993689	3.02241	0.0150417	1.80585		94.9884	57.3999	96.1936	2.7739	96.2428	1.72509
20	302.337	96.394	3.13647		20.5178	2.39946	0.121966	3.01477	0.0181497	1.82522		135.235	56.4186	116.853	3.32771	115.952	2.09745
22	1203.41	81.4276	14.7788		20.6911	1.84574	0.096272	2.52204	0.0144471	1.7187		115.478	43.5345	93.3293	2.24887	92.4659	1.57787
24	10162.3	138.535	73.3557		21.0023	0.965075	0.0961788	1.35095	0.0146503	0.945348		80.0991	22.9231	93.243	1.20355	93.7565	0.879912
26	2241.64	448.661	4.99628		20.8036	1.1741	0.0948491	1.65967	0.014311	1.17303		102.625	27.7492	92.0105	1.45993	91.601	1.06691
28	2269.35	107.173	21.1746		21.0993	1.0732	0.0967271	1.64959	0.0148018	1.25275		69.1861	25.5413	93.7507	1.47725	94.7192	1.17792
30	2763.96	539.246	5.1256		21.0386	1.28294	0.0945491	2.05628	0.0144269	1.60697		76.0025	30.4884	91.7323	1.80358	92.3372	1.47326
32	461.05	177.116	2.60309		21.4799	2.94666	0.0919525	3.43476	0.014325	1.76486		26.4677	70.6844	89.3205	2.93688	91.6896	1.60673
34	1385.13	119.612	11.5802		21.0613	1.26191	0.104032	1.98878	0.0158909	1.53716		73.4331	29.9761	100.491	1.90284	101.634	1.55003
35	1123.21	304.918	3.68365		21.0839	1.78968	0.105945	2.13097	0.0162006	1.15675		70.9045	42.5462	102.25	2.07279	103.599	1.1888
37	2659.21	120.579	22.0537		20.583	1.11923	0.0913748	1.88084	0.0136406	1.51158		127.815	26.3172	88.7833	1.59895	87.3387	1.31129
38	895.059	351.753	2.54456		21.0705	1.76151	0.089965	2.39781	0.0137482	1.62683		72.4285	41.8817	87.4708	2.00958	88.023	1.42225
39	1172.53	54.7866	21.4018		20.5813	1.57277	0.104418	2.0913	0.0155864	1.37837		128.005	37.0057	100.846	2.00765	99.7017	1.36369
41	1786.25	114.576	15.59		20.9885	1.29961	0.0999624	1.82907	0.0152166	1.28705		81.6573	30.8408	96.7416	1.68779	97.3537	1.24358
43	1411.08	400.88	3.51997		21.0823	2.02401	0.0956031	2.46528	0.014618	1.40749		71.0914	48.1227	92.7095	2.18432	93.5517	1.30722
45	374.16	161.277	2.31999		20.895	3.46063	0.101546	3.78148	0.0153887	1.52436		92.2526	81.9797	98.202	3.53958	98.4465	1.48928
46	3251.89	96.3262	33.7591		20.9787	1.1662	0.0997953	1.65148	0.015184	1.16935		82.7748	27.6945	96.5874	1.5216	97.1468	1.12746
47	1729.3	336.952	5.13219		20.9871	1.40287	0.102934	2.20752	0.0156679	1.70444		81.8163	33.3082	99.4812	2.09192	100.219	1.69496
48	2078.67	456.089	4.55761		21.0021	1.59087	0.0956846	2.24594	0.0145748	1.58537		80.1252	37.784	92.7851	1.99152	93.2772	1.46814
49	392.458	42.313	9.27511		21.1675	2.80934	0.103221	3.25102	0.0158467	1.63607		61.5111	66.9466	99.7457	3.08858	101.353	1.64525
Cores
2	1645.01	759.551	2.16576		20.7708	1.41926	0.0943461	1.99945	0.0142127	1.40836		106.351	33.5405	91.5439	1.75029	90.976	1.27227
4	515.054	213.557	2.41179		20.5992	2.15907	0.0972002	2.40538	0.0145216	1.06033		125.922	50.8319	94.1886	2.16369	92.9393	0.978389
6	583.041	410.622	1.4199		21.2599	2.13439	0.105237	2.46816	0.0162266	1.23944		51.1	50.951	101.599	2.38625	103.764	1.27579
8	1327.65	951.812	1.39487		20.4422	1.75345	0.100703	2.34672	0.0149302	1.55964		143.926	41.143	97.4247	2.18003	95.535	1.47902
10	375.772	31.5663	11.9042		21.0792	2.51259	0.101603	2.82802	0.0155332	1.29791		71.4188	59.7629	98.2551	2.64847	99.3634	1.27976
14	773.771	210.555	3.67491		21.5067	2.38362	0.0886769	2.72378	0.0138319	1.31808		23.4878	57.1842	86.2701	2.25275	88.5552	1.15925
16	475.095	278.175	1.7079		21.1588	2.62208	0.099412	3.13256	0.0152556	1.71395		62.4826	62.4558	96.2334	2.87613	97.6012	1.66024
19	1056.67	643.401	1.64232		20.9553	1.49823	0.108583	1.83733	0.0165027	1.06352		85.4678	35.5471	104.668	1.8273	105.515	1.11303
21	128.256	53.6666	2.38986		20.3539	5.16733	0.105461	5.67781	0.0155682	2.35293		154.048	121.106	101.805	5.50001	99.5858	2.32518
23	1400.97	414.336	3.38123		20.7501	1.978	0.101051	2.49428	0.0152076	1.51953		108.715	46.7286	97.7461	2.32439	97.2965	1.46735
25	5614.18	104.088	53.937		20.3439	1.17305	0.0957663	1.85758	0.0141301	1.44034		155.24	27.444	92.8608	1.64844	90.4512	1.29371
27	1480.9	310.527	4.76898		20.6417	1.679	0.0959456	2.17625	0.0143638	1.38457		121.113	39.5862	93.0269	1.93453	91.9361	1.26388
29	3981.52	111.335	35.7617		20.1466	1.48937	0.102948	1.88265	0.0150424	1.15159		177.971	34.7089	99.4937	1.78428	96.2474	1.10014
31	1248.62	255.124	4.89417		20.8324	1.81054	0.0956378	2.19899	0.01445	1.248		99.3602	42.8396	92.7417	1.94902	92.4838	1.14596
33	786.186	226.2	3.47563		20.984	1.60785	0.0964888	2.34231	0.0146847	1.7033		82.1666	38.1478	93.5301	2.0929	93.9753	1.58907
36	2677.35	1043.3	2.56623		20.5635	1.37667	0.102375	1.72136	0.0152682	1.03337		130.038	32.3622	98.9658	1.62317	97.6813	1.0018
40	143.565	71.577	2.00574		20.5413	4.30339	0.104595	4.67062	0.0155825	1.81537		132.54	101.238	101.009	4.4907	99.6765	1.79558
42	1320.97	123.053	10.735		20.9521	1.6147	0.105061	2.27754	0.0159651	1.60622		85.8218	38.2767	101.438	2.19864	102.104	1.6271
44	719.396	209.346	3.4364		20.8005	1.92691	0.0963052	2.35035	0.0145286	1.34579		102.974	45.56	93.36	2.09643	92.9833	1.24238
50	644.748	126.681	5.08954		21.0725	1.79985	0.106718	2.21936	0.01631	1.2985		72.2033	42.7998	102.959	2.173	104.293	1.34335
Sample 14WM39a - Boudinaged leucosome within melanocratic diatexite (N44.41895°, W116.13708°)
Rims
51	4107.47	718.881	5.7137		20.2902	1.06718	0.161691	1.87857	0.0237941	1.54602		161.426	24.9594	152.182	2.65493	151.59	2.31627
53	1746.67	95.7539	18.2413		20.1304	1.2498	0.159399	1.98597	0.0232721	1.54339		179.85	29.1319	150.177	2.7724	148.303	2.26276
55	6167.28	470.542	13.1068		18.2564	2.59671	0.166721	3.11796	0.0220752	1.7259		403.036	58.1419	156.569	4.52403	140.758	2.403
56	3686.17	432.614	8.52071		13.5784	7.17933	0.210994	7.57603	0.0207786	2.41938		1031.78	145.294	194.386	13.4037	132.575	3.17473
57	1037.87	18.3082	56.6889		20.7325	1.92118	0.107206	2.4748	0.0161202	1.56004		110.752	45.364	103.406	2.43311	103.089	1.59544
59	2520.14	15.236	165.407		20.2018	1.22172	0.144516	2.01144	0.0211741	1.59791		171.582	28.5083	137.058	2.57888	135.072	2.13587
61	1372.27	278.048	4.93535		20.6475	1.76336	0.142128	2.13594	0.0212836	1.20533		120.408	41.5593	134.937	2.69889	135.764	1.61929
62	2150.59	259.912	8.27429		19.8552	1.51146	0.152168	2.34432	0.0219127	1.79202		211.837	35.0429	143.825	3.14381	139.733	2.4771
64	1018.12	14.5778	69.8408		20.1894	2.74568	0.130236	3.35794	0.0190701	1.93314		173.015	64.0879	124.31	3.92886	121.776	2.33201
66	3687.71	319.389	11.5461		20.0168	1.00648	0.148647	1.82115	0.02158	1.51776		193.061	23.4252	140.717	2.39303	137.634	2.06681
68	6270.57	1254.39	4.99889		20.344	0.902298	0.143918	2.57422	0.0212349	2.4109		155.234	21.1198	136.528	3.2885	135.456	3.23164
69	2357.92	47.8545	49.2726		18.3624	1.54366	0.160992	2.38031	0.0214404	1.81189		390.061	34.6288	151.571	3.3515	136.753	2.45171
71	6234.84	1452.71	4.29187		20.3656	0.885216	0.148714	2.46676	0.0219658	2.30246		152.732	20.7319	140.776	3.24264	140.068	3.19022
73	191.522	161.197	1.18813		20.4113	2.89088	0.146147	3.20869	0.021635	1.39231		147.471	67.8155	138.504	4.1544	137.981	1.90071
75	4180.85	765.469	5.46182		20.3284	0.916391	0.146136	2.04162	0.0215455	1.8244		157.029	21.4377	138.494	2.64317	137.416	2.4805
76	1754.07	82.1299	21.3573		20.324	1.56621	0.142897	2.29799	0.0210635	1.68159		157.497	36.6578	135.621	2.91739	134.374	2.23623
77	4019.75	109.853	36.592		20.3032	1.16328	0.14392	1.83905	0.0211926	1.42439		159.889	27.2145	136.529	2.34936	135.189	1.90556
78	866.973	23.1636	37.4282		21	2.15514	0.115454	2.7018	0.0175844	1.62944		80.3617	51.1816	110.943	2.83951	112.371	1.81516
79	5621.22	1210.91	4.64213		20.4603	1.1084	0.145641	2.39756	0.021612	2.12597		141.826	26.0173	138.056	3.09483	137.836	2.89925
81	2187.01	19.0565	114.764		20.5869	1.14119	0.151666	1.85618	0.0226453	1.46393		127.365	26.8363	143.382	2.48206	144.353	2.08973
83	7062.44	1748.11	4.04004		20.4311	1.21679	0.143906	3.50266	0.021324	3.28451		145.175	28.5334	136.517	4.47424	136.018	4.42074
85	1941.07	63.3627	30.6343		20.4487	1.71795	0.146999	2.52218	0.0218011	1.84662		143.184	40.3049	139.259	3.28215	139.029	2.53985
87	1288.43	29.0158	44.4046		20.4823	1.57551	0.141496	2.45622	0.0210194	1.88435		139.301	36.9904	134.375	3.09149	134.096	2.50073
89	5201.17	922.263	5.63957		20.6573	1.30336	0.139461	1.98675	0.0208941	1.49947		119.329	30.7101	132.563	2.46902	133.304	1.97833
90	6600.73	1388.59	4.75355		20.3495	1.20928	0.14095	3.47425	0.0208026	3.257		154.551	28.2955	133.89	4.35804	132.726	4.2787
92	4832.02	907.152	5.32658		20.2135	1.13269	0.15068	2.11562	0.02209	1.78686		170.235	26.437	142.512	2.813	140.851	2.48952
94	989.715	188.398	5.25332		20.6877	1.7035	0.146698	2.46495	0.0220108	1.78159		115.854	40.192	138.992	3.20194	140.351	2.47346
96	1332.59	343.805	3.876		20.7251	1.54935	0.152284	2.48717	0.0228901	1.94564		111.565	36.563	143.926	3.33756	145.896	2.80672
97	3406.6	588.069	5.79285		20.765	1.28364	0.154435	1.88039	0.0232582	1.37409		107.065	30.3384	145.82	2.5542	148.215	2.01336
98	4524.51	682.417	6.63014		16.4873	2.49851	0.183751	3.26495	0.0219724	2.10175		626.919	53.8591	171.283	5.14611	140.11	2.91298
99	2617.3	851.967	3.07206		20.5886	1.15091	0.152599	1.8887	0.0227865	1.49753		127.172	27.0724	144.204	2.53903	145.243	2.15073
100	1966.1	246.109	7.98873		20.8252	1.42048	0.150766	2.2636	0.0227716	1.76242		100.181	33.6082	142.588	3.01126	145.149	2.52954
Cores
52	205.456	121.419	1.69212		20.5747	3.26333	0.143454	3.62577	0.0214065	1.58016		128.77	76.8008	136.116	4.61879	136.539	2.13485
54	1020.68	230.451	4.42907		20.7317	1.44314	0.159393	2.46203	0.0239664	1.99473		110.818	34.0707	150.171	3.43687	152.675	3.00967
58	382.135	248.775	1.53607		20.133	2.25871	0.145559	2.64564	0.0212543	1.37755		179.539	52.6324	137.983	3.41337	135.578	1.84816
60	3604.17	106.399	33.8742		19.9086	1.21741	0.146721	1.76598	0.0211852	1.27929		205.634	28.2657	139.013	2.2943	135.142	1.71087
63	110.204	45.4044	2.42716		19.9912	5.37335	0.148315	5.65015	0.0215042	1.7468		196.04	124.962	140.423	7.41006	137.155	2.37053
65	253.994	116.489	2.1804		20.6067	2.53015	0.140087	2.86128	0.0209365	1.33613		125.064	59.5667	133.121	3.56986	133.572	1.76633
67	3977.56	243.789	16.3156		20.4569	1.62957	0.143788	2.37455	0.0213335	1.72714		142.242	38.2463	136.413	3.03104	136.078	2.32563
70	659.457	109.559	6.01921		20.3036	2.10732	0.151093	3.1227	0.0222493	2.30445		159.86	49.3089	142.876	4.16195	141.856	3.23329
72	225.415	159.552	1.4128		20.5717	3.52448	0.143632	4.13823	0.0214299	2.16864		129.103	82.9318	136.274	5.27732	136.687	2.93304
74	395.554	425.69	0.929207		21.0612	2.11064	0.140586	2.89166	0.0214745	1.97658		73.4465	50.1806	133.566	3.61903	136.968	2.67873
80	291.382	293.828	0.991678		20.2838	2.73766	0.141754	3.16809	0.0208538	1.59438		162.143	64.0225	134.605	3.99387	133.05	2.09957
82	170.138	95.8831	1.77443		20.5688	3.31172	0.142167	3.63428	0.0212083	1.49684		129.396	77.9174	134.972	4.59326	135.288	2.00395
84	2055.71	722.448	2.84548		20.4322	1.60954	0.148601	2.12301	0.022021	1.3844		145.042	37.736	140.676	2.78892	140.416	1.9229
86	292.039	295.362	0.988749		20.6911	2.87024	0.139975	3.42949	0.0210056	1.877		115.471	67.6946	133.022	4.2758	134.008	2.48936
88	113.558	47.244	2.40365		21.2013	4.13475	0.139686	4.5725	0.021479	1.95232		57.6622	98.6062	132.764	5.69056	136.996	2.64639
91	252.797	231.291	1.09298		18.9238	3.99324	0.157319	4.56875	0.0215918	2.2198		322.1	90.7443	148.354	6.30609	137.708	3.02443
95	984.893	169.365	5.8152		20.878	1.93606	0.14289	2.78651	0.0216366	2.00407		94.1711	45.8607	135.615	3.53744	137.991	2.73606
Sample 14WM58 - Nebulitic diatexite (N44.42994°, W116.13438°)
Rims
51	576.223	33.4618	17.2203		20.1695	2.32523	0.102402	2.6375	0.0149798	1.24487		175.316	54.2424	98.9916	2.48767	95.8496	1.18438
53	589.832	29.4749	20.0113		20.4502	1.94754	0.0989482	2.41668	0.0146759	1.43089		142.99	45.7066	95.8049	2.20943	93.9194	1.33414
54	526.743	47.6042	11.0651		20.309	1.436	0.130208	1.91719	0.019179	1.27024		159.224	33.6219	124.285	2.24272	122.465	1.54091
57	3130.15	29.4402	106.322		19.9595	0.903908	0.141266	1.62589	0.0204496	1.35147		199.73	21.0021	134.171	2.04349	130.497	1.7459
59	2576.02	154.534	16.6696		20.5126	1.19475	0.163067	1.78415	0.0242596	1.32506		135.828	28.0522	153.384	2.53994	154.521	2.02314
61	468.453	38.6455	12.1218		20.5163	1.78106	0.1018	2.25544	0.0151476	1.38378		135.445	41.8475	98.4362	2.11595	96.9155	1.33106
63	1950.78	8.78995	221.933		20.5899	1.09212	0.139683	1.69248	0.0208591	1.29296		127.032	25.7058	132.761	2.10626	133.083	1.70307
65	437.016	22.783	19.1816		20.936	2.5585	0.100399	2.91254	0.0152449	1.39175		87.6434	60.6469	97.1449	2.69826	97.5333	1.3472
67	607.694	31.355	19.3811		20.4937	2.42974	0.0991885	2.86225	0.0147428	1.51291		137.999	57.1008	96.027	2.62258	94.3447	1.41695
68	563.311	33.3203	16.906		20.2262	1.58988	0.152236	2.23718	0.0223321	1.57393		168.764	37.1271	143.884	3.00128	142.378	2.21636
69	358.992	69.1475	5.19169		20.2264	1.71607	0.142741	2.32731	0.0209395	1.57209		168.743	40.0725	135.482	2.95179	133.591	2.07855
71	1458	37.5907	38.7862		13.3089	2.58742	0.166942	2.88982	0.0161141	1.28698		1072.21	51.9967	156.762	4.19777	103.05	1.31568
73	716.155	58.6957	12.2012		20.4741	1.58834	0.145404	2.12192	0.0215914	1.40703		140.271	37.2931	137.846	2.73514	137.706	1.91702
74	718.101	81.43	8.81863		20.2765	1.6712	0.152353	2.13451	0.0224048	1.32786		162.965	39.082	143.987	2.86545	142.836	1.87581
76	446.263	21.4016	20.8519		20.9644	2.00314	0.0951306	2.50783	0.0144644	1.50885		84.3936	47.5343	92.2716	2.21199	92.5756	1.38685
78	266.486	59.0663	4.51164		19.9106	2.27346	0.144257	2.75462	0.0208314	1.55541		205.389	52.7402	136.828	3.52619	132.908	2.04611
80	173.176	42.6143	4.06379		19.9994	2.88198	0.147887	3.25242	0.0214508	1.50744		195.089	66.9924	140.044	4.2547	136.819	2.04073
82	752.295	53.5144	14.0578		20.4612	1.8535	0.143508	2.53748	0.0212965	1.73301		141.716	43.5092	136.164	3.23349	135.845	2.32957
84	197.818	28.0219	7.05941		20.5819	3.86751	0.0978763	4.40907	0.0146104	2.11715		127.938	91.0615	94.8141	3.9912	93.5033	1.96532
86	364.576	50.0528	7.28382		20.3346	2.43963	0.129405	2.87836	0.0190847	1.52747		156.308	57.1177	123.563	3.3487	121.868	1.84402
87	544.321	29.027	18.7523		20.6666	2.11733	0.101557	2.6075	0.0152222	1.52184		118.242	49.9114	98.2127	2.44095	97.3894	1.47098
89	931.882	86.1611	10.8156		20.4865	1.45872	0.140712	2.22269	0.0209073	1.67705		138.838	34.246	133.678	2.78397	133.388	2.21399
90	719.039	55.2817	13.0068		20.0207	1.69737	0.148974	2.16599	0.0216315	1.34553		192.616	39.4577	141.006	2.85159	137.959	1.83655
92	2140.96	7.08459	302.2		20.4574	1.08123	0.14691	1.70875	0.0217972	1.32317		142.157	25.3623	139.18	2.22244	139.004	1.81957
94	851.615	17.8172	47.7974		20.0808	1.65302	0.109215	2.40953	0.0159061	1.7531		185.589	38.495	105.247	2.40896	101.73	1.76944
95	1800.04	34.721	51.843		20.4429	1.46363	0.0992514	2.25067	0.0147156	1.70978		143.819	34.3413	96.0851	2.0634	94.1718	1.59842
96	1735.56	127.8	13.5803		19.3182	1.92848	0.143194	2.51311	0.0200628	1.61143		275.004	44.2052	135.885	3.19631	128.053	2.04312
98	644.316	42.2102	15.2645		20.7581	1.64365	0.107145	2.1826	0.016131	1.43602		107.842	38.8312	103.351	2.14473	103.157	1.46957
100	786.484	32.6858	24.062		20.522	1.73609	0.113869	2.25496	0.0169482	1.43904		134.753	40.8022	109.499	2.34067	108.34	1.54602
Cores
52	574.317	47.0158	12.2154		20.1988	1.66576	0.13837	2.48699	0.0202706	1.84672		171.931	38.8852	131.591	3.06948	129.366	2.36522
55	273.416	26.3649	10.3705		20.5132	1.86849	0.137701	2.28645	0.0204865	1.31781		135.793	43.907	130.994	2.80997	130.73	1.70542
58	524.582	47.7455	10.987		20.1182	2.09494	0.147651	2.35779	0.0215438	1.08185		181.26	48.8211	139.835	3.08008	137.405	1.4708
60	561.318	69.2857	8.10151		20.6341	1.82215	0.146123	2.11964	0.0218676	1.08289		121.934	42.9309	138.483	2.74397	139.448	1.49386
62	637.323	67.6423	9.42195		20.4405	1.5935	0.141366	2.37929	0.0209573	1.76686		144.105	37.3665	134.26	2.99226	133.703	2.33802
64	853.054	61.917	13.7774		20.4002	1.66242	0.115902	5.50762	0.0171485	5.25073		148.722	38.967	111.35	5.80851	109.609	5.70663
66	763.818	92.1495	8.2889		20.368	1.88447	0.142699	2.50114	0.0210799	1.64453		152.473	44.1308	135.445	3.17146	134.477	2.18861
70	129.554	33.8484	3.8275		21.2557	3.07233	0.135289	3.49339	0.0208562	1.66271		51.5545	73.3293	128.839	4.22703	133.065	2.18981
72	366.426	32.1192	11.4083		20.0169	2.50476	0.142004	3.15528	0.0206156	1.91885		193.048	58.2618	134.827	3.98385	131.546	2.49859
75	951.371	132.629	7.17319		20.6713	1.46922	0.151686	2.01991	0.0227412	1.38617		117.69	34.6638	143.399	2.70132	144.957	1.98692
77	167.072	30.4182	5.49251		20.0333	3.42805	0.140123	3.88645	0.0203593	1.8311		191.146	79.7447	133.154	4.85003	129.926	2.35527
79	205.615	47.8384	4.29811		20.2253	2.98215	0.140366	3.3879	0.02059	1.60769		168.867	69.64	133.37	4.2343	131.384	2.09087
81	219.175	42.9889	5.09842		20.4821	2.65029	0.135279	3.15389	0.0200957	1.70967		139.362	62.2459	128.83	3.81599	128.261	2.17117
83	494.318	35.8998	13.7694		20.3308	2.10057	0.142975	2.68881	0.0210821	1.67847		156.716	49.1661	135.69	3.41519	134.491	2.23402
85	375.482	38.5596	9.73771		20.5197	2.21104	0.144984	2.68376	0.0215769	1.52114		135.022	51.9683	137.473	3.45061	137.615	2.07113
88	1172.21	50.2573	23.3241		20.1778	2.46598	0.156296	4.79822	0.0228728	4.11605		174.361	57.5358	147.455	6.58558	145.787	5.9333
91	277.978	69.7405	3.98588		20.2367	2.27301	0.140362	2.56075	0.0206009	1.17936		167.554	53.1147	133.366	3.2004	131.453	1.5346
93	625.19	81.1974	7.69963		20.507	1.62529	0.142329	2.31532	0.0211687	1.64899		136.472	38.167	135.116	2.92918	135.038	2.2036
97	402.041	36.9607	10.8775		19.4595	2.38413	0.147786	2.75662	0.0208575	1.38379		258.314	54.7986	139.955	3.60396	133.073	1.82258
99	1511.51	66.9664	22.5711		20.2249	1.09542	0.146889	1.6217	0.0215465	1.1958		168.912	25.5917	139.161	2.10896	137.422	1.62591
Sample 14WM115 - Agmatic diatexite (44.43280°, W116.14230°)
Rims
51	140.966	141.945	0.993104		20.6436	4.22909	0.103843	4.68437	0.0155476	2.01447		120.858	99.7007	100.318	4.47461	99.4552	1.98812
53	177.818	47.8866	3.71331		20.9709	3.22289	0.0967674	3.4792	0.0147179	1.31066		83.6558	76.5096	93.7881	3.11692	94.186	1.22549
55	96.2093	22.8676	4.20722		20.5555	3.84904	0.106207	4.24128	0.0158336	1.78139		130.92	90.5327	102.49	4.13473	101.27	1.78993
56	81.5888	10.294	7.92588		19.7872	4.9405	0.109817	5.14011	0.0157598	1.41851		219.783	114.368	105.798	5.16445	100.802	1.41877
57	258.097	422.957	0.61022		20.2518	2.64498	0.10716	2.98439	0.0157397	1.38226		165.811	61.7988	103.364	2.93298	100.674	1.38077
58	123.822	30.691	4.03448		20.1327	3.89404	0.106389	4.12807	0.0155345	1.3702		179.578	90.7744	102.657	4.03059	99.3721	1.35115
60	405.487	27.3344	14.8343		21.1671	2.00485	0.100176	2.64277	0.0153789	1.72186		61.5539	47.7738	96.9387	2.44338	98.3839	1.68118
62	796.13	312.363	2.54873		20.8517	1.79405	0.0982938	2.28293	0.014865	1.41178		97.1662	42.4502	95.2002	2.07458	95.1208	1.33304
64	64.114	19.5845	3.27371		20.1691	5.27057	0.104836	5.47259	0.0153354	1.47321		175.361	123.034	101.23	5.27277	98.1082	1.4344
65	209.552	32.9344	6.36269		21.0517	3.56797	0.0990783	3.86759	0.0151274	1.4926		74.5419	84.8045	95.9252	3.54016	96.7873	1.43386
66	130.111	89.8149	1.44866		20.9776	3.62176	0.102283	4.03141	0.0155618	1.77063		82.8928	85.9476	98.8816	3.79839	99.5449	1.74904
67	88.4911	59.2188	1.49431		20.7506	4.76983	0.101263	5.15959	0.0152398	1.96727		108.683	112.69	97.9413	4.81734	97.5011	1.90368
68	2131.41	188.676	11.2967		20.6326	1.18575	0.103885	1.9917	0.0155456	1.60027		122.103	27.9372	100.357	1.9032	99.4424	1.57914
70	93.8715	19.4906	4.81625		20.5817	3.71068	0.101239	4.22124	0.0151122	2.0124		127.966	87.3462	97.9191	3.94038	96.6904	1.93128
71	123.677	20.2119	6.11901		20.355	3.44972	0.102179	3.82987	0.0150845	1.66352		153.96	80.8121	98.7859	3.60517	96.5151	1.59359
72	413.031	255.219	1.61834		21.1405	1.45416	0.111187	2.25662	0.0170479	1.72562		64.5262	34.627	107.051	2.29275	108.972	1.86463
73	86.0548	57.4662	1.49749		21.7663	5.50428	0.0972035	5.80137	0.015345	1.8327		5.37832	132.898	94.1917	5.21866	98.1688	1.78551
74	696.441	65.3137	10.663		21.1737	1.455	0.101173	2.3977	0.0155367	1.90577		60.8024	34.6805	97.8584	2.23684	99.386	1.87954
75	684.768	68.43	10.0068		21.0781	1.97125	0.101266	2.20785	0.0154808	0.99437		71.5914	46.8731	97.9442	2.06144	99.0309	0.977208
77	608.369	654.544	0.929455		20.9546	1.64237	0.101707	2.09102	0.0154571	1.29421		85.5479	38.9345	98.3507	1.96008	98.8805	1.26996
79	921.235	77.5034	11.8864		20.9676	1.23586	0.101397	1.64452	0.0154196	1.08494		84.0291	29.322	98.0655	1.53728	98.6428	1.06206
81	491.977	44.9054	10.9559		20.7809	1.64193	0.0969383	2.5137	0.0146103	1.90335		105.207	38.7963	93.9462	2.25557	93.5024	1.76683
82	146.785	14.6021	10.0523		21.6379	3.75066	0.098992	4.12228	0.0155351	1.71049		8.88515	90.2669	95.8455	3.7703	99.3757	1.68678
83	125.78	5.11662	24.5827		20.6561	4.73132	0.0980435	4.98846	0.0146881	1.58095		119.461	111.565	94.9687	4.52271	93.997	1.47527
84	2305.11	309.691	7.44326		21.0705	1.35413	0.0980063	1.89596	0.0149771	1.32702		72.4261	32.1856	94.9344	1.71834	95.8327	1.26231
86	494.626	525.725	0.940845		20.5528	2.23972	0.102895	2.63203	0.0153378	1.38247		131.245	52.6801	99.4447	2.49333	98.1229	1.34625
87	92.0419	23.808	3.86601		20.7888	3.79506	0.101878	4.18095	0.0153606	1.75439		104.354	89.7383	98.5087	3.92514	98.2682	1.71093
88	70.2105	6.46101	10.8668		21.4221	5.06414	0.0981934	5.39992	0.0152561	1.87448		32.9216	121.353	95.1074	4.90258	97.6043	1.81579
Cores
52	306.65	425.54	0.720614		20.7972	2.71793	0.103654	3.02776	0.0156347	1.33423		103.394	64.2395	100.143	2.88738	100.008	1.32404
54	108.4	79.2667	1.36753		20.8668	3.97464	0.101739	4.3516	0.0153972	1.77163		95.4602	94.1358	98.3805	4.08029	98.5007	1.7318
59	53.7007	7.10677	7.55627		20.8657	4.71958	0.101079	4.98381	0.0152966	1.60123		95.5902	111.773	97.7722	4.64556	97.8614	1.55515
61	80.9911	6.05031	13.3863		20.1027	5.55745	0.10261	5.80747	0.0149604	1.68567		183.051	129.544	99.1829	5.48769	95.7268	1.60172
63	394.775	195.534	2.01896		21.0516	2.52041	0.0967533	3.03024	0.0147724	1.68222		74.553	59.9156	93.775	2.71434	94.5323	1.57864
69	498.392	556.928	0.894895		20.7286	2.07071	0.103715	2.64572	0.0155923	1.6468		111.157	48.8955	100.2	2.52441	99.739	1.62986
76	2272.99	82.7625	27.4639		20.0581	1.25297	0.099595	1.73654	0.0144886	1.20234		188.22	29.1444	96.4025	1.59706	92.7295	1.10695
78	530.739	321.812	1.64922		20.8968	1.88482	0.0969115	2.44663	0.0146877	1.55996		92.0691	44.6776	93.9214	2.19484	93.9944	1.45563
80	159.828	136.81	1.16824		20.6011	3.34655	0.101627	3.79793	0.0151844	1.7958		125.699	78.8253	98.2771	3.55757	97.1495	1.73153
85	1574.08	520.084	3.0266		20.9441	1.37021	0.0967805	1.95955	0.014701	1.40084		86.7328	32.4982	93.8001	1.75572	94.0791	1.30833
Analyses with >10% uncertainty (1-sigma) in 206Pb/238U age are not included.
Analyses with >10% uncertainty (1-sigma) in 207Pb/235U age are not included, unless 206Pb/238U age is <400Ma.
Concordance is based on 206Pb/238U age / 206Pb/207Pb age. Value is not reported for 206Pb/238U ages <400 Ma because of large uncertainty in 206Pb/207Pb age.
Analyses with 206Pb/238U age >400 Ma and with >20% discordance (<80% concordance) are not included.
Analyses with 206Pb/238U age >400 Ma and with >5% reverse discordance (<105% concordance) are not included.
All uncertainties are reported at the 1-sigma level, and include only measurement errors.
Systematic errors are as follows (at 2-sigma level): [sample 13WM24: 1.4% (206Pb/238U) & 1.0% (206Pb/207Pb); sample 13WM25: 1.2% (206Pb/238U) & 1.0% (206Pb/207Pb);
	sample 13WM30: 1.2% (206Pb/238U) & 1.0% (206Pb/207Pb); sample 14WM37a: 1.4% (206Pb/238U) & 0.9% (206Pb/207Pb); sample 14WM39a: 1.4% (206Pb/238U)
	& 0.9% (206Pb/207Pb); sample 14WM58: 1.4% (206Pb/238U) & 1.0% (206Pb/207Pb); sample 14WM115: 1.2% (206Pb/238U) & 1.0% (206Pb/207Pb)].
Analyses conducted by LA-ICPMS, as described by Gehrels et al. (2008) and Gehrels and Pecha (2014).
U concentration and U/Th are calibrated relative to FC-1 zircon standard and are accurate to ~20%
Common Pb correction is from measured 204Pb with common Pb composition interpreted from Stacey and Kramers (1975).
Common Pb composition assigned uncertainties of 1.5 for 206Pb/204Pb, 0.3 for 207Pb/204Pb, and 2.0 for 208Pb/204Pb.
U/Pb and 206Pb/207Pb fractionation is calibrated relative to fragments of large Sri Lanka zircons and individual crystals of FC-1, and R33.
U decay constants and composition as follows: 238U = 9.8485 x 10-10, 235U = 1.55125 x 10-10, 238U/235U = 137.88.
Weighted mean determined with Isoplot 3.75 (Ludwig, 2012).
