# Supplementary material
Source: publisher figshare collection journal article supplement (https://gsapubs.figshare.com/ndownloader/files/23303249)
Supplement: Supplementary file 1 [file 23303249 › L555_TableDR2.xlsx]

## Sheet: Monazite
Montz, W.J., and Kruckenberg, S.C., 2017, Cretaceous partial melting, deformation, and exhumation of the Potters Pond migmatite domain, west-central Idaho: Lithosphere, doi:10.1130/L555.1.
TABLE DR2. Summary of LA-ICP-MS U-Pb monazite results for migmatitic rocks in the Potters Pond migmatite domain
				Isotope Ratios									Ages (in Ma)
Grain	U	Th	U/Th	206Pb*	±1σ	208Pb*	±1σ	207Pb*/	±1σ	206Pb*/	±1σ		206Pb*	±1σ	208Pb*	±1σ	207Pb*/	±1σ	206Pb*/	±1σ
Number	(ppm)	(ppm)		207Pb*	(%)	232Th	(%)	235U	(%)	238U	(%)		207Pb*	(%)	232Th	(%)	235U	(%)	238U	(%)
Sample 13WM24 - Leucosome in stromatic metatexite (N44.42670°, W116.12759°)
Rims
6	1989.91	39739.6	0.0500739	20.4581	1.09048	0.00470851	3.70318	0.10437	2.03092	0.0154861	1.71333		142.087	25.5738	94.8983	3.50601	100.802	1.94888	99.0646	1.68433
12	5717.09	122548	0.046652	20.6069	0.838921	0.00433604	2.80573	0.094382	3.61042	0.0141059	3.5116		125.041	19.7531	87.4075	2.44712	91.5772	3.16162	90.297	3.14877
13	2291.04	51217.2	0.0447319	20.3638	0.83594	0.00463134	6.57613	0.102752	4.22721	0.0151757	4.14373		152.927	19.5707	93.3465	6.12443	99.3136	3.99943	97.0939	3.99316
17	2328.59	19059.2	0.122176	20.316	0.81475	0.00500503	2.49284	0.106805	3.19964	0.0157373	3.09417		158.415	19.059	100.859	2.508	103.038	3.13511	100.659	3.09037
21	2145.13	61770.1	0.0347277	20.4551	1.57133	0.00460315	5.4987	0.101891	5.66006	0.0151159	5.43757		142.428	36.8802	92.7796	5.08998	98.5203	5.31437	96.7145	5.21967
Cores
13	2343.91	51520.8	0.0454944	20.3701	1.6845	0.00459238	3.79809	0.102092	3.32189	0.0150829	2.86311		152.187	39.4873	92.5629	3.50758	98.7055	3.12457	96.5045	2.74246
17	1547.47	18216.1	0.0849509	20.4142	1.47624	0.00510341	3.31177	0.110468	5.48502	0.0163556	5.28263		147.157	34.6177	102.837	3.39707	106.393	5.54041	104.582	5.48012
21	2076.99	60595.6	0.0342762	20.5781	1.78561	0.00463218	3.06991	0.101952	3.29282	0.015216	2.76663		128.375	41.9971	93.3633	2.85956	98.5766	3.09337	97.3497	2.67308
Sample 13WM25 - Schlieren-textured granodiorite diatexite (N44.41028°, W116.13582°)
Rims
1	803.593	48962.2	0.0164125	21.077	0.935089	0.00442352	4.04722	0.0908203	3.76346	0.0138832	3.64544		71.7072	22.2177	89.1671	3.60084	88.2672	3.18162	88.8816	3.21789
2	3928.47	40164.5	0.0978095	20.8783	0.717474	0.00455279	1.97294	0.0957183	3.56043	0.014494	3.48739		94.1518	16.9902	91.7669	1.8064	92.8163	3.15813	92.7638	3.21187
3	456.938	29918.1	0.015273	22.3912	2.86874	0.00468032	2.50484	0.0928763	3.19769	0.0150828	1.41264		-74.1198	70.1489	94.3313	2.35734	90.1793	2.75932	96.5039	1.3531
4	1523.87	40136.9	0.0379668	20.293	1.59864	0.00494468	1.81257	0.112579	2.63383	0.0165693	2.09318		161.091	37.4093	99.6463	1.80171	108.322	2.70612	105.937	2.19934
5	2351.78	41415.2	0.0567854	20.4092	0.967027	0.00459991	10.2676	0.0971498	7.24099	0.0143803	7.17612		147.72	22.6743	92.7144	9.49776	94.142	6.51043	92.0409	6.55804
7	1384.07	40993.5	0.0337632	19.4456	2.32106	0.00437168	3.00895	0.109863	4.38014	0.0154943	3.7146		259.925	53.3279	88.1243	2.64584	105.84	4.40252	99.1166	3.65363
8	782.884	47604.3	0.0164457	20.5861	1.45133	0.00440257	3.4467	0.101313	2.36063	0.0151264	1.86177		127.465	34.177	88.7456	3.05209	97.9873	2.20501	96.7809	1.78838
9	845.995	37006	0.022861	20.2435	1.56598	0.00461765	2.35767	0.0921647	5.44209	0.0135316	5.21192		166.774	36.6034	93.071	2.18926	89.5179	4.66311	86.6452	4.48566
10	999.088	35792.4	0.0279134	20.786	1.58474	0.00454143	1.54643	0.0947961	3.96327	0.0142909	3.63264		104.624	37.4663	91.5384	1.41238	91.9613	3.48452	91.4732	3.29943
12	508.011	55485.6	0.00915573	21.4836	1.76268	0.0044552	2.88993	0.0900451	3.45235	0.0140303	2.96845		26.0424	42.2586	89.8042	2.58952	87.5454	2.89575	89.8165	2.64767
13	869.278	28192.5	0.0308337	20.3239	1.69877	0.00444448	3.66324	0.0941846	3.85327	0.0138831	3.45859		157.504	39.7546	89.5885	3.27458	91.394	3.36783	88.8806	3.05292
14	1455.7	36126.8	0.0402943	20.5164	1.12776	0.00457029	3.52167	0.0951964	1.85815	0.0141651	1.47678		135.438	26.4954	92.1188	3.23674	92.3326	1.63998	90.6736	1.32967
15	919.084	40383.3	0.022759	20.3123	1.30572	0.00449497	11.7251	0.0937335	4.41791	0.0138087	4.22055		158.887	30.5296	90.604	10.5996	90.9753	3.84443	88.4073	3.7058
16	305.832	44714.4	0.00683967	21.9527	3.72904	0.00439143	5.1203	0.083739	4.4011	0.0133326	2.3375		-25.9828	90.3584	88.5216	4.52266	81.6542	3.45299	85.3793	1.98258
17	543.195	33717.5	0.0161102	21.4665	1.87728	0.00447253	4.02201	0.092	3.04747	0.0143234	2.40061		27.9439	45.0043	90.1527	3.61787	89.3648	2.60697	91.6798	2.1853
18	3234.69	31768.7	0.10182	20.9535	0.537502	0.00446399	4.3534	0.094904	3.359	0.0144225	3.31571		85.6651	12.7562	89.9809	3.90852	92.0614	2.95631	92.3093	3.0389
19	744.884	35479.9	0.0209946	22.2294	2.02706	0.00460075	5.59333	0.0917114	5.20551	0.014786	4.79461		-56.418	49.3952	92.7313	5.17488	89.0964	4.44029	94.6187	4.50347
20	506.429	42508.3	0.0119137	21.1549	2.52053	0.00457059	2.12864	0.0924745	4.37435	0.0141883	3.57517		62.8938	60.0379	92.1248	1.95654	89.8059	3.75972	90.8212	3.22425
21	557.285	30112.8	0.0185066	20.4728	3.17754	0.0045914	1.31846	0.0979547	5.12091	0.0145446	4.01583		140.425	74.6272	92.5433	1.21736	94.8867	4.63896	93.0852	3.71129
22	2626.64	25728.8	0.102089	20.9847	0.658844	0.00436229	6.00827	0.0915139	8.04472	0.013928	8.0177		82.0922	15.6373	87.9353	5.27191	88.9127	6.84866	89.1661	7.09986
23	1144.8	43682.2	0.0262074	20.1919	1.26006	0.00448179	2.67005	0.0953636	3.23817	0.0139656	2.98295		172.727	29.4002	90.3388	2.40671	92.4875	2.86256	89.405	2.6485
24	3641.86	23479.1	0.155111	21.1333	0.660126	0.00453051	2.79024	0.0941407	2.86681	0.0144292	2.78977		65.3241	15.6938	91.3188	2.54227	91.3533	2.50457	92.352	2.55804
25	1470.85	33963.9	0.0433063	20.9961	1.51623	0.00451469	5.09486	0.0961824	2.62924	0.0146465	2.14802		80.7976	36.0048	91.0007	4.62593	93.2462	2.34247	93.7326	1.99883
26	1113.95	31795.7	0.0350346	21.1436	1.05301	0.0044067	3.30637	0.0924831	3.04256	0.0141821	2.85453		64.1624	25.0767	88.8287	2.93056	89.8138	2.61527	90.7815	2.57322
Cores
1	760.903	40398.6	0.0188349	19.2226	1.50188	0.00445946	4.91101	0.100742	2.51511	0.0140451	2.01746		286.359	34.3376	89.8897	4.40469	97.4613	2.3373	89.9104	1.80131
3	511.358	32226.6	0.0158676	20.5642	2.17873	0.00469637	4.10457	0.096137	4.29255	0.0143384	3.69854		129.93	51.2578	94.6541	3.87606	93.2042	3.82273	91.7751	3.37029
4	652.78	38283.7	0.0170511	20.77	1.9746	0.00454527	3.5912	0.0957487	3.22475	0.0144234	2.5495		106.44	46.6492	91.6156	3.28265	92.8445	2.86121	92.3154	2.33681
9	1003.94	31003.7	0.0323813	21.4317	1.75139	0.0044474	1.57114	0.0907772	2.14272	0.0141102	1.23446		31.8704	41.9556	89.6473	1.40536	88.2271	1.81066	90.3243	1.10724
12	779.643	51578.9	0.0151155	20.3055	2.31392	0.00438203	6.1399	0.0941008	3.47085	0.0138582	2.587		159.661	54.1631	88.3325	5.41168	91.3163	3.03112	88.7223	2.27953
15	892.49	42823.5	0.0208411	20.9851	0.784423	0.00447309	3.79772	0.0912368	3.33507	0.0138861	3.24151		82.0466	18.6109	90.1639	3.41655	88.6549	2.83131	88.8996	2.86191
Sample 13WM30 - Schlieren-textured granodiorite diatexite (N44.40779°, W116.13957°)
1	555	40074	0.0138494	20.2891	2	0.0047	2	0.0994	4.5	0.0146	4		161.5	46.7	94.5	1.9	96.3	4.1	93.6	3.7
2	2135	51612	0.0413663	21.1799	0.6	0.0045	2.3	0.0944	2.5	0.0145	2.5		60.1	14.2	90.5	2.1	91.6	2.2	92.8	2.3
3	2182	35685	0.0611461	20.7064	1.2	0.0045	8.2	0.0921	9.9	0.0138	9.8		113.7	28	91.2	7.5	89.4	8.5	88.5	8.6
5	1262	43751	0.0288451	21.0521	0.7	0.0041	5.7	0.0917	1.7	0.014	1.5		74.5	17.8	83.5	4.7	89	1.4	89.6	1.3
6	404	45136	0.00895073	19.9669	2.1	0.0045	5.4	0.0966	4.5	0.014	4		198.8	47.9	91	4.9	93.7	4.1	89.6	3.6
7	727	36489	0.0199238	20.4843	1.5	0.0047	9.7	0.1015	4.5	0.0151	4.2		139.1	35.2	93.9	9.1	98.1	4.2	96.5	4.1
8	559	30326	0.018433	21.5641	2.1	0.0045	2.6	0.0902	4.8	0.0141	4.3		17.1	50.4	90.8	2.4	87.7	4	90.3	3.9
9	306	38511	0.00794578	20.2009	5.9	0.0046	2.8	0.0929	9.4	0.0136	7.3		171.7	137.3	91.8	2.6	90.2	8.1	87.2	6.3
10	662	18330	0.0361157	22.0375	1.3	0.005	5.3	0.098	5.7	0.0157	5.5		-35.3	30.8	101.6	5.3	95	5.1	100.2	5.5
11	821	71061	0.0115535	23.0444	1.8	0.0044	6.3	0.0852	2.9	0.0142	2.3		-144.9	43.7	88	5.5	83	2.3	91.1	2.1
12	747	69620	0.0107297	21.2471	0.8	0.0044	3.1	0.0934	3.9	0.0144	3.8		52.5	18.6	89	2.8	90.7	3.4	92.2	3.5
13	263	17718	0.0148437	20.244	3.5	0.0046	10.2	0.0995	5.2	0.0146	3.9		166.7	81.7	93.1	9.5	96.3	4.8	93.5	3.6
14	882	57786	0.0152632	21.2706	2.1	0.0044	3.7	0.0916	7.4	0.0141	7.1		49.9	50.6	88.8	3.3	89	6.3	90.4	6.4
15	456	30239	0.0150799	21.0755	1.7	0.0048	2.9	0.1002	3.1	0.0153	2.6		71.9	40.4	95.8	2.7	97	2.8	98	2.5
16	580	39596	0.0146479	22.2308	1.9	0.0046	2.8	0.0906	6.3	0.0146	6		-56.6	46.1	92.6	2.6	88.1	5.3	93.5	5.6
17	1758	27719	0.0634222	20.9285	0.9	0.0046	13.3	0.1026	4.4	0.0156	4.3		88.5	21	93.7	12.4	99.2	4.1	99.6	4.3
18	882	40336	0.0218663	21.2139	0.8	0.0044	2.4	0.096	6.7	0.0148	6.7		56.3	19.2	88.7	2.1	93.1	6	94.5	6.3
19	680	32719	0.020783	15.8769	8.1	0.0045	1.9	0.1165	8.2	0.0134	1.3		707.7	172.3	90.3	1.7	111.9	8.7	85.9	1.1
20	438	38356	0.0114193	22.3292	2	0.0044	2.2	0.0831	7.4	0.0135	7.1		-67.3	49.7	89.3	2	81.1	5.8	86.2	6.1
21	451	35072	0.0128593	21.367	1.2	0.0046	1	0.0927	4.1	0.0144	4		39.1	28.6	93.5	1	90	3.6	92	3.6
22	513	37383	0.0137228	24.0904	1.7	0.0046	2.3	0.0872	3.2	0.0152	2.7		-256.1	44.2	93.3	2.2	84.9	2.6	97.5	2.6
23	457	21186	0.0215708	20.4697	3.6	0.0047	3	0.0939	6.3	0.0139	5.2		140.8	84.3	94.8	2.9	91.2	5.5	89.3	4.6
25	1417	31715	0.0446792	21.334	1.5	0.0047	5.5	0.0966	4.5	0.0149	4.2		42.8	36.2	94.8	5.2	93.6	4	95.6	4
26	301	44911	0.00670214	19.5477	4.3	0.0045	5.2	0.0931	5	0.0132	2.5		247.9	98.5	90.5	4.7	90.4	4.3	84.5	2.1
27	730	43202	0.0168974	22.8289	1.1	0.0046	1.9	0.0859	3.3	0.0142	3.1		-121.7	27.6	91.8	1.8	83.7	2.7	91	2.8
29	826	32514	0.0254044	22.2416	1.3	0.0043	3.6	0.0872	2.8	0.0141	2.4		-57.8	32.3	87.3	3.1	84.8	2.2	90	2.2
30	309	29054	0.0106354	22.4137	2.9	0.0047	2.6	0.0861	3.7	0.014	2.2		-76.6	71.5	94.5	2.5	83.9	2.9	89.6	2
Sample 14WM37a - Discordant leucosome in stromatic metatexite (N44.41924°, W116.13478°)
Rims
1	2158.37	51313.9	0.042062	21.4102	1.42414	0.0045809	2.91985	0.090687	2.44915	0.014082	1.99253		34.2827	34.1063	92.3321	2.68981	88.1432	2.06772	90.1451	1.78366
3	2201.99	45715.1	0.0481676	20.8844	1.42864	0.00462877	2.94445	0.0967813	3.4097	0.0146592	3.09597		93.4531	33.8365	93.2947	2.74068	93.8009	3.05505	93.8136	2.88341
5	1992.74	7823.62	0.254708	21.0412	1.37303	0.00428753	2.66645	0.0893046	4.33518	0.0136283	4.112		75.7073	32.629	86.4316	2.29973	86.8554	3.6088	87.2607	3.56398
6	521.917	38718.4	0.0134798	21.5853	1.34065	0.00471553	4.59835	0.106361	5.95721	0.0166509	5.8044		14.7402	32.2033	95.0393	4.35998	102.631	5.81517	106.455	6.12832
8	1418.12	77951.7	0.0181923	21.1302	1.1367	0.00437112	7.26926	0.0943417	7.83213	0.0144579	7.74921		65.6721	27.0753	88.1131	6.39122	91.5398	6.85594	92.5346	7.11948
9	808.639	52193.3	0.0154932	21.8427	1.51184	0.00442852	2.9463	0.106525	5.52455	0.0168755	5.31366		-13.835	36.5168	89.2676	2.62429	102.781	5.40032	107.878	5.6846
11	1083.84	67144	0.0161421	20.1806	1.5167	0.00455525	1.39399	0.0996156	2.91705	0.0145801	2.49175		174.039	35.3898	91.8163	1.27701	96.4214	2.68325	93.3105	2.30832
13	1034.77	72175.2	0.0143369	20.0004	1.62895	0.00445714	3.44393	0.0942223	4.02853	0.0136676	3.6845		194.968	37.853	89.8432	3.08727	91.429	3.5223	87.5101	3.20253
16	1769.16	45664.7	0.0387424	20.7835	1.54087	0.00467916	3.39415	0.09961	5.17823	0.0150148	4.94366		104.913	36.4284	94.3081	3.1935	96.4163	4.76298	96.0724	4.71427
17	1674.25	54570.9	0.0306802	21.2291	1.27205	0.00463731	2.88916	0.0956968	4.83397	0.0147342	4.66359		54.5886	30.3631	93.4664	2.69416	92.7964	4.2869	94.2899	4.3653
18	1374.94	87559.2	0.0157029	20.9945	0.924795	0.00439067	2.83301	0.0952945	3.90978	0.0145101	3.79883		80.986	21.9506	88.5063	2.50191	92.4235	3.45399	92.8663	3.50255
19	2921.76	49291	0.0592757	20.7225	0.633495	0.00473924	9.63479	0.0988328	4.42459	0.0148539	4.379		111.881	14.9753	95.516	9.18105	95.6983	4.04087	95.0504	4.13173
20	1018.4	45574.8	0.0223458	21.5575	1.78394	0.00450763	1.61067	0.0902649	3.00213	0.0141129	2.41461		17.7879	42.8391	90.8586	1.46014	87.7501	2.52375	90.3415	2.16618
21	2120.64	93967.2	0.0225679	21.1452	0.651135	0.00441998	4.51771	0.0965604	5.63552	0.0148085	5.59778		63.9908	15.4971	89.0957	4.01622	93.5963	5.03888	94.7617	5.26575
22	1178.55	89639.2	0.0131477	21.4364	0.978237	0.00436914	2.30235	0.0897483	4.50682	0.0139533	4.39937		31.3041	23.4545	88.0732	2.02334	87.2689	3.76879	89.327	3.90272
Cores
1	1256.21	67819.3	0.0185229	20.8441	1.30334	0.00444279	2.50789	0.0957379	7.88818	0.0144732	7.77976		98.069	30.8658	89.5545	2.24096	92.8344	6.99827	92.6318	7.155
2	1091.72	47096.1	0.0231807	20.9402	1.17942	0.00475341	2.87694	0.0982958	4.17002	0.0149284	3.99975		87.1786	27.9668	95.801	2.74961	95.202	3.78953	95.5235	3.79253
3	1609.08	52273.3	0.0307821	20.6593	1.43318	0.0046105	2.33811	0.0977432	2.66207	0.0146454	2.24335		119.05	33.7816	92.9273	2.16775	94.691	2.40677	93.7258	2.08738
9	1464.51	48803.4	0.0300084	20.4601	1.63606	0.00466639	3.76072	0.101437	4.63158	0.0150522	4.333		141.894	38.3906	94.0513	3.52878	98.1018	4.3311	96.31	4.14209
11	1606.27	59937.6	0.026799	20.7692	1.18346	0.00456914	1.55373	0.0969763	3.50146	0.0146078	3.2954		106.53	27.9848	92.0956	1.42766	93.9814	3.14303	93.4869	3.05853
12	1063.11	54819	0.019393	20.0257	1.63152	0.00459983	2.26025	0.101732	2.33774	0.0147756	1.67427		192.034	37.9457	92.7128	2.09074	98.3743	2.19185	94.5528	1.57152
13	1587.96	51985.2	0.0305463	20.0681	1.06577	0.0044275	3.654	0.0937853	3.23208	0.0136502	3.05131		187.066	24.8052	89.2469	3.25389	91.0234	2.81395	87.3997	2.64884
14	1858.88	50114.3	0.0370927	20.656	1.12883	0.00451614	2.98252	0.100251	7.47407	0.0150187	7.38833		119.468	26.6098	91.0297	2.70887	97.0078	6.91496	96.0969	7.0473
15	546.536	68232.7	0.00800988	22.1736	2.20494	0.00440518	2.89377	0.0869459	3.17898	0.0139825	2.29		-50.2973	53.6569	88.7982	2.56398	84.6544	2.58202	89.5125	2.03567
16	1023.68	54047.2	0.0189404	20.9863	1.20479	0.00443941	4.51482	0.0958825	5.7232	0.014594	5.59495		81.9107	28.5909	89.4866	4.03122	92.9684	5.0845	93.399	5.18796
18	1103.82	79226.2	0.0139325	20.3595	1.42074	0.00440251	4.41158	0.0964785	4.08335	0.0142461	3.82822		153.443	33.2778	88.7444	3.90644	93.5205	3.6482	91.1881	3.46631
19	1899.04	51627	0.0367839	21.1952	1.67896	0.00463789	1.66701	0.099671	3.60125	0.0153217	3.18592		58.3929	40.0174	93.4782	1.55469	96.4726	3.31429	98.0207	3.09924
22	412.409	63470.6	0.00649763	21.449	1.49896	0.00443047	4.53574	0.0887651	3.63197	0.0138085	3.30822		29.9437	35.9058	89.3067	4.04178	86.3524	3.00664	88.4066	2.90472
Sample 14WM39a - Boudinaged leucosome within melanocratic diatexite (N44.41895°, W116.13708°)
Rims
1	1359	61976		20.2993	2.8	0.0044	6	0.0945	5.2	0.0139	4.3		160.4	65.5	89.7	5.4	91.7	4.5	89.1	3.8
2	993	64699		17.3563	1.2	0.0046	3.7	0.1142	1.8	0.0144	1.3		515.2	26.8	92.3	3.4	109.8	1.8	92	1.2
3	2815	69724		21.0361	0.7	0.0045	3	0.0949	2.9	0.0145	2.8		76.3	17.7	90.1	2.7	92	2.6	92.7	2.6
4	2238	64291		19.4329	0.9	0.0046	4.6	0.1011	4	0.0142	3.9		261.4	21	92.6	4.3	97.8	3.8	91.2	3.6
5	1285	67125		21.2985	2.1	0.0045	5.1	0.0895	4.2	0.0138	3.7		46.8	50.1	89.8	4.5	87.1	3.5	88.6	3.2
6	1066	60744		18.0623	1.2	0.0044	4.3	0.1054	4.7	0.0138	4.5		426.9	26.9	89.5	3.9	101.8	4.6	88.4	4
7	2881	60740		21.4973	2	0.0045	7.2	0.0904	3.9	0.0141	3.3		24.5	48.4	91.4	6.6	87.8	3.2	90.2	3
8	1825	68755		18.7375	1.6	0.0045	5	0.1029	4.2	0.014	3.9		344.5	36.3	91.4	4.5	99.4	4	89.5	3.5
9	1516	60989		21.3277	1.8	0.0044	4.1	0.095	2.5	0.0147	1.8		43.5	42.1	89.6	3.7	92.1	2.2	94	1.7
10	1102	58003		21.8006	1.6	0.0043	2	0.0867	3.1	0.0137	2.6		-9.2	39.6	86.2	1.7	84.4	2.5	87.7	2.3
11	777	63335		20.0634	1.9	0.0045	4.1	0.0937	3.2	0.0136	2.6		187.6	44.4	89.8	3.6	91	2.8	87.3	2.2
12	1322	59197		21.1812	1.9	0.0045	2.5	0.0912	5.4	0.014	5		59.9	45.9	90.1	2.2	88.6	4.6	89.7	4.5
13	1506	67320		20.5006	1.3	0.0044	3.5	0.0939	4	0.014	3.8		137.2	31	88.7	3.1	91.1	3.5	89.4	3.4
14	1055	62610		19.9381	1.2	0.0043	9.5	0.0955	8	0.0138	7.9		202.2	28	86.8	8.2	92.6	7.1	88.4	6.9
15	1058	58006		17.8213	1.2	0.0044	2	0.1047	3.8	0.0135	3.6		456.8	26.3	88.3	1.8	101.1	3.6	86.6	3.1
16	1807	61334		19.6545	1	0.0045	4.8	0.1007	1.8	0.0144	1.4		235.4	23.4	91.2	4.4	97.5	1.6	91.9	1.3
17	2768	80127		20.1196	0.8	0.0044	2.7	0.0964	4	0.0141	4		181.1	17.5	89.1	2.4	93.5	3.6	90.1	3.5
Cores
3	1975	69891		19.2554	0.7	0.0048	1.9	0.1095	1.9	0.0153	1.8		282.5	16.6	96.9	1.9	105.5	1.9	97.9	1.7
4	1833	65962		20.7859	1.3	0.0046	0.9	0.0949	5.1	0.0143	5		104.6	30.1	92.1	0.8	92.1	4.5	91.6	4.5
6	1202	62593		17.9899	1	0.0045	3.5	0.1085	3.9	0.0142	3.8		435.9	22.4	91.1	3.1	104.6	3.9	90.6	3.4
7	2224	56304		20.8434	0.8	0.0045	5	0.0924	4.5	0.014	4.4		98.2	18	89.8	4.5	89.7	3.9	89.4	3.9
8	1663	66697		21.2965	1.6	0.0044	2.8	0.0907	3.8	0.014	3.5		47	39.2	88.8	2.5	88.2	3.2	89.7	3.1
11	1364	63105		21.9289	2.8	0.0045	5.3	0.0864	6.9	0.0137	6.3		-23.4	68.9	89.7	4.8	84.1	5.6	88	5.5
Sample 14WM58 - Nebulitic diatexite (N44.42994°, W116.13438°)
Rims
1	2334	57903		20.5318	1.2	0.0046	7.1	0.1002	4.9	0.0149	4.8		133.6	28.4	93.4	6.7	97	4.5	95.5	4.5
2	1399	43224		20.6453	1.3	0.0045	3.1	0.0952	4.6	0.0143	4.4		120.7	31.3	90.3	2.8	92.4	4	91.3	4
3	1016	44047		21.6402	1.2	0.0045	1.7	0.0916	4.7	0.0144	4.5		8.6	28.2	91.5	1.5	89	4	92	4.1
5	1657	40374		20.4753	0.6	0.0045	4.4	0.0944	4	0.014	4		140.1	13	91.2	4	91.6	3.5	89.7	3.6
6	1169	45487		20.9768	1.1	0.0045	2.7	0.0962	3.2	0.0146	3		83	25	91.1	2.4	93.2	2.8	93.6	2.8
7	653	54494		19.5378	2.1	0.0046	6.7	0.1001	3.2	0.0142	2.4		249.1	48.3	92.1	6.2	96.9	2.9	90.8	2.2
8	2529	46983		20.6135	1.2	0.0046	3.8	0.0939	4	0.014	3.8		124.3	28.4	92.2	3.5	91.1	3.5	89.9	3.4
9	1976	49720		20.4471	1.5	0.0046	2.9	0.0948	3.4	0.0141	3		143.3	35.1	91.8	2.6	91.9	3	90	2.7
10	1948	39598		20.1903	0.7	0.0044	16.4	0.096	2.6	0.0141	2.5		172.9	16.8	89	14.6	93.1	2.3	90	2.2
12	1226	44798		20.4199	1.4	0.0045	4.6	0.098	5.4	0.0145	5.2		146.5	33.6	91.4	4.2	94.9	4.9	92.9	4.8
13	1149	41547		20.2453	1.4	0.0045	5.4	0.0981	5.1	0.0144	4.9		166.6	32.1	90.7	4.9	95	4.6	92.2	4.5
14	1444	43356		20.6156	1	0.0045	2.1	0.0949	5.2	0.0142	5.1		124	24.3	91.2	1.9	92.1	4.5	90.8	4.6
15	1418	41994		20.4299	1.1	0.0045	5	0.0947	4.2	0.014	4.1		145.3	25.2	90.1	4.5	91.9	3.7	89.8	3.6
16	1002	43551		21.9395	1.8	0.0045	3.4	0.0912	6.5	0.0145	6.2		-24.5	44.2	90.9	3.1	88.7	5.5	92.9	5.7
17	1007	46087		20.7416	1.4	0.0045	2.1	0.0957	3.9	0.0144	3.6		109.7	34	90.9	1.9	92.8	3.5	92.2	3.3
19	2654	62996		20.1365	0.5	0.0046	3.3	0.1015	2.8	0.0148	2.7		179.1	12.7	92.3	3.1	98.1	2.6	94.8	2.6
20	846	48673		21.1695	1.9	0.0045	4.7	0.0921	3.1	0.0141	2.5		61.3	44.3	89.9	4.2	89.5	2.7	90.5	2.3
21	2233	53240		21.2689	1	0.0046	2.7	0.095	4	0.0147	3.9		50.1	24.7	93.1	2.6	92.2	3.5	93.8	3.6
22	1591	40498		20.9356	1.2	0.0045	2.3	0.0947	4.6	0.0144	4.4		87.7	28.1	91.4	2.1	91.9	4	92	4.1
23	1239	50012		20.8187	1.2	0.0044	6.7	0.0941	6.4	0.0142	6.3		100.9	28.9	88.9	5.9	91.3	5.6	90.9	5.7
Cores
1	3009	58020		20.6792	1.2	0.0046	3.5	0.0954	7.4	0.0143	7.3		116.8	29.3	93.2	3.2	92.6	6.5	91.6	6.6
2	613	19238		22.4472	2.1	0.0049	2.8	0.0967	3.8	0.0157	3.1		-80.2	52	99.5	2.8	93.7	3.4	100.7	3.1
3	449	19512		21.2249	1.8	0.005	5.3	0.1027	5.6	0.0158	5.3		55	42.3	99.9	5.3	99.3	5.3	101.2	5.3
5	1093	25679		20.5536	1	0.0048	6.4	0.106	2	0.0158	1.7		131.1	22.5	95.8	6.1	102.3	1.9	101.1	1.8
6	1232	47248		20.2748	1.6	0.0046	2.7	0.0978	4.2	0.0144	3.9		163.2	36.9	91.7	2.5	94.8	3.8	92.1	3.6
8	2603	55903		20.4399	1.2	0.0046	6.5	0.0971	4.8	0.0144	4.6		144.2	29.3	92.1	6	94.1	4.3	92.1	4.2
8	1581	25148		20.7873	1.1	0.0049	8.2	0.1031	6.2	0.0155	6.1		104.5	26.8	99.2	8.2	99.7	5.9	99.5	6
9	929	54490		20.197	2	0.0045	3	0.0949	5.2	0.0139	4.9		172.1	45.7	91	2.7	92	4.6	89	4.3
10	1220	43740		21.0859	0.8	0.0044	9.9	0.0925	2.3	0.0141	2.1		70.7	20	88.4	8.7	89.8	2	90.5	1.9
12	1515	45565		21.2801	1.2	0.0044	3.3	0.0906	5.2	0.014	5		48.8	29.3	89.7	2.9	88	4.3	89.5	4.5
14	994	43422		20.6976	1.9	0.0045	4.3	0.0946	5.1	0.0142	4.7		114.7	45.3	90.7	3.9	91.8	4.5	90.9	4.3
17	1313	44252		22.2992	1.7	0.0044	7.3	0.0864	9.6	0.014	9.4		-64.1	42.2	88.3	6.4	84.2	7.7	89.5	8.4
Sample 14WM115 - Agmatic diatexite (44.43280°, W116.14230°)
Rims
1	1840.42	170476	0.0107958	20.7036	2.73645	0.00444836	5.69318	0.096896	4.85512	0.0145496	4.0105		114.031	64.5493	89.6665	5.09356	93.9071	4.35485	93.1167	3.7076
1R	1741.97	168998	0.0103076	20.76	1.4211	0.00459845	2.37247	0.0975938	2.48186	0.0146943	2.03472		107.627	33.579	92.6851	2.19389	94.5528	2.24072	94.0363	1.89949
1RR	1747.18	170796	0.0102296	20.5327	1.99835	0.00455145	11.0997	0.0966176	9.11341	0.014388	8.89162		133.558	46.9582	91.7398	10.1598	93.6493	8.15307	92.0902	8.1301
1RRR	2115.18	166425	0.0127095	19.8023	1.4403	0.0044023	8.44464	0.100039	4.29013	0.0143676	4.04114		218.06	33.3614	88.7403	7.47736	96.8127	3.96156	91.9606	3.68987
1(R)	2102.56	172796	0.0121679	20.9328	0.704367	0.00446146	6.5778	0.0952833	9.16723	0.0144658	9.14013		88.0072	16.7144	89.9301	5.90228	92.4131	8.09781	92.5847	8.40189
2	2532.44	156404	0.0161917	20.9341	1.83791	0.00444675	4.77674	0.0955254	4.44751	0.0145034	4.04999		87.8682	43.5803	89.6342	4.27211	92.6375	3.93772	92.8237	3.73242
2R	3589	136259	0.0263395	20.9869	1.60631	0.00428152	5.0333	0.0915538	3.17796	0.0139356	2.74211		81.8387	38.1289	86.3106	4.335	88.9498	2.70651	89.2142	2.4295
2RR	2226.7	147112	0.0151361	20.7617	1.99793	0.00433939	4.59586	0.0952872	6.02123	0.0143482	5.68009		107.433	47.211	87.4748	4.01153	92.4167	5.31894	91.8369	5.17944
2RRR	2538.77	161389	0.0157308	21.0079	1.05129	0.00439506	3.52521	0.0936708	4.70522	0.014272	4.58627		79.4637	24.9615	88.5946	3.1163	90.9171	4.09195	91.3532	4.16016
2(RR)	2141.14	180860	0.0118387	20.879	2.09385	0.00441425	3.88144	0.09742	4.5634	0.0147522	4.05467		94.0775	49.5877	88.9805	3.44613	94.392	4.11335	94.4043	3.7999
Cores
1C	1846.65	195494	0.0094461	21.0439	2.04742	0.00444319	10.0687	0.0943158	7.36715	0.0143949	7.07693		75.3987	48.6595	89.5625	8.99785	91.5158	6.44729	92.1342	6.4739
1CC	1801.24	196825	0.00915147	20.5897	1.64978	0.00446936	5.05549	0.0960693	3.63256	0.0143461	3.23631		127.053	38.8087	90.089	4.5443	93.1415	3.23289	91.8236	2.95063
1CCC	1778.45	191234	0.00929989	20.9003	2.96238	0.00451484	1.72014	0.0960177	3.72166	0.0145546	2.25279		91.6943	70.205	91.0036	1.56187	93.0937	3.31056	93.149	2.08337
2C	1864.31	142648	0.0130693	21.1964	1.35985	0.00436024	5.03537	0.0924306	3.11405	0.0142094	2.80145		58.2124	32.4161	87.8942	4.41618	89.765	2.67534	90.9552	2.53018
2CC	1909.97	156642	0.0121933	20.9691	2.12626	0.00431969	5.14473	0.0950174	3.74368	0.0144505	3.08126		83.8521	50.4724	87.0786	4.47032	92.1666	3.29847	92.4872	2.82943
2CCC	2317.88	171061	0.01355	21.1172	1.38405	0.00433793	2.93483	0.0954167	1.86366	0.0146137	1.24805		67.1281	32.945	87.4454	2.56083	92.5368	1.64832	93.5243	1.15881
Standard analyses with >10% uncertainty (1-sigma) in 206Pb/238U age are not included.
Standard analyses with >10% uncertainty (1-sigma) in 206Pb/207Pb age are not included, unless 206Pb/238U age is <600 Ma.
All uncertainties are reported at the 1-sigma level, and include only measurement errors.
Systematic errors are as follows (at 2-sigma level): [Sample: 13WM025: 1.5% (206Pb/238U), 1.2% (208Pb/232Th); Sample: 14WM037a: 1.2% (206Pb/238U), 1.4% (208Pb/232Th);
	Sample: 13MW058: 1.2% (206Pb/238U), 1.4% (208Pb/232Th); Sample: 13WM030: 1.7% (206Pb/238U), 1.1% (208Pb/232Th); Sample: 14WM039a: 1.2% (206Pb/238U), 1.4% (208Pb/232Th) ].
Analyses conducted by LA-MC-ICPMS, as described by Gehrels et al. (2008).
U concentration and U/Th are calibrated relative to 44069 monazite standard and are accurate to ~20%.
Common Pb correction is from measured 204Pb with common Pb composition interpreted from Stacey and Kramers (1975).
Common Pb composition assigned uncertainties of 1.5 for 206Pb/204Pb, 0.3 for 207Pb/204Pb, and 2.0 for 208Pb/204Pb.
U/Pb and 206Pb/207Pb fractionation is calibrated relative to individual grains of 44069 monazite with an ID-TIMS age of 424.9 ± 0.4 Ma (2-sigma).
U and Th decay constants and U composition as follows: 235U = 9.8485 x 10-10, 238U = 1.55125 x 10-10, 232Th =4.9475 x 10-11, 238U/235U = 137.88.
Weighted mean and concordia plots constructed using Isoplot 3.75 (Ludwig, 2012), with uncertainties reported at the 2-sigma level, and incorporate both the measurement and instrumental errors.
